# Supplementary figures and images for: Phylogeography of Bulinus truncatus (Audouin, 1827) (Gastropoda: Planorbidae) in Selected African Countries
Source: MDPI journal article supplement (doi:10.3390/tropicalmed3040127), 2018-12-19

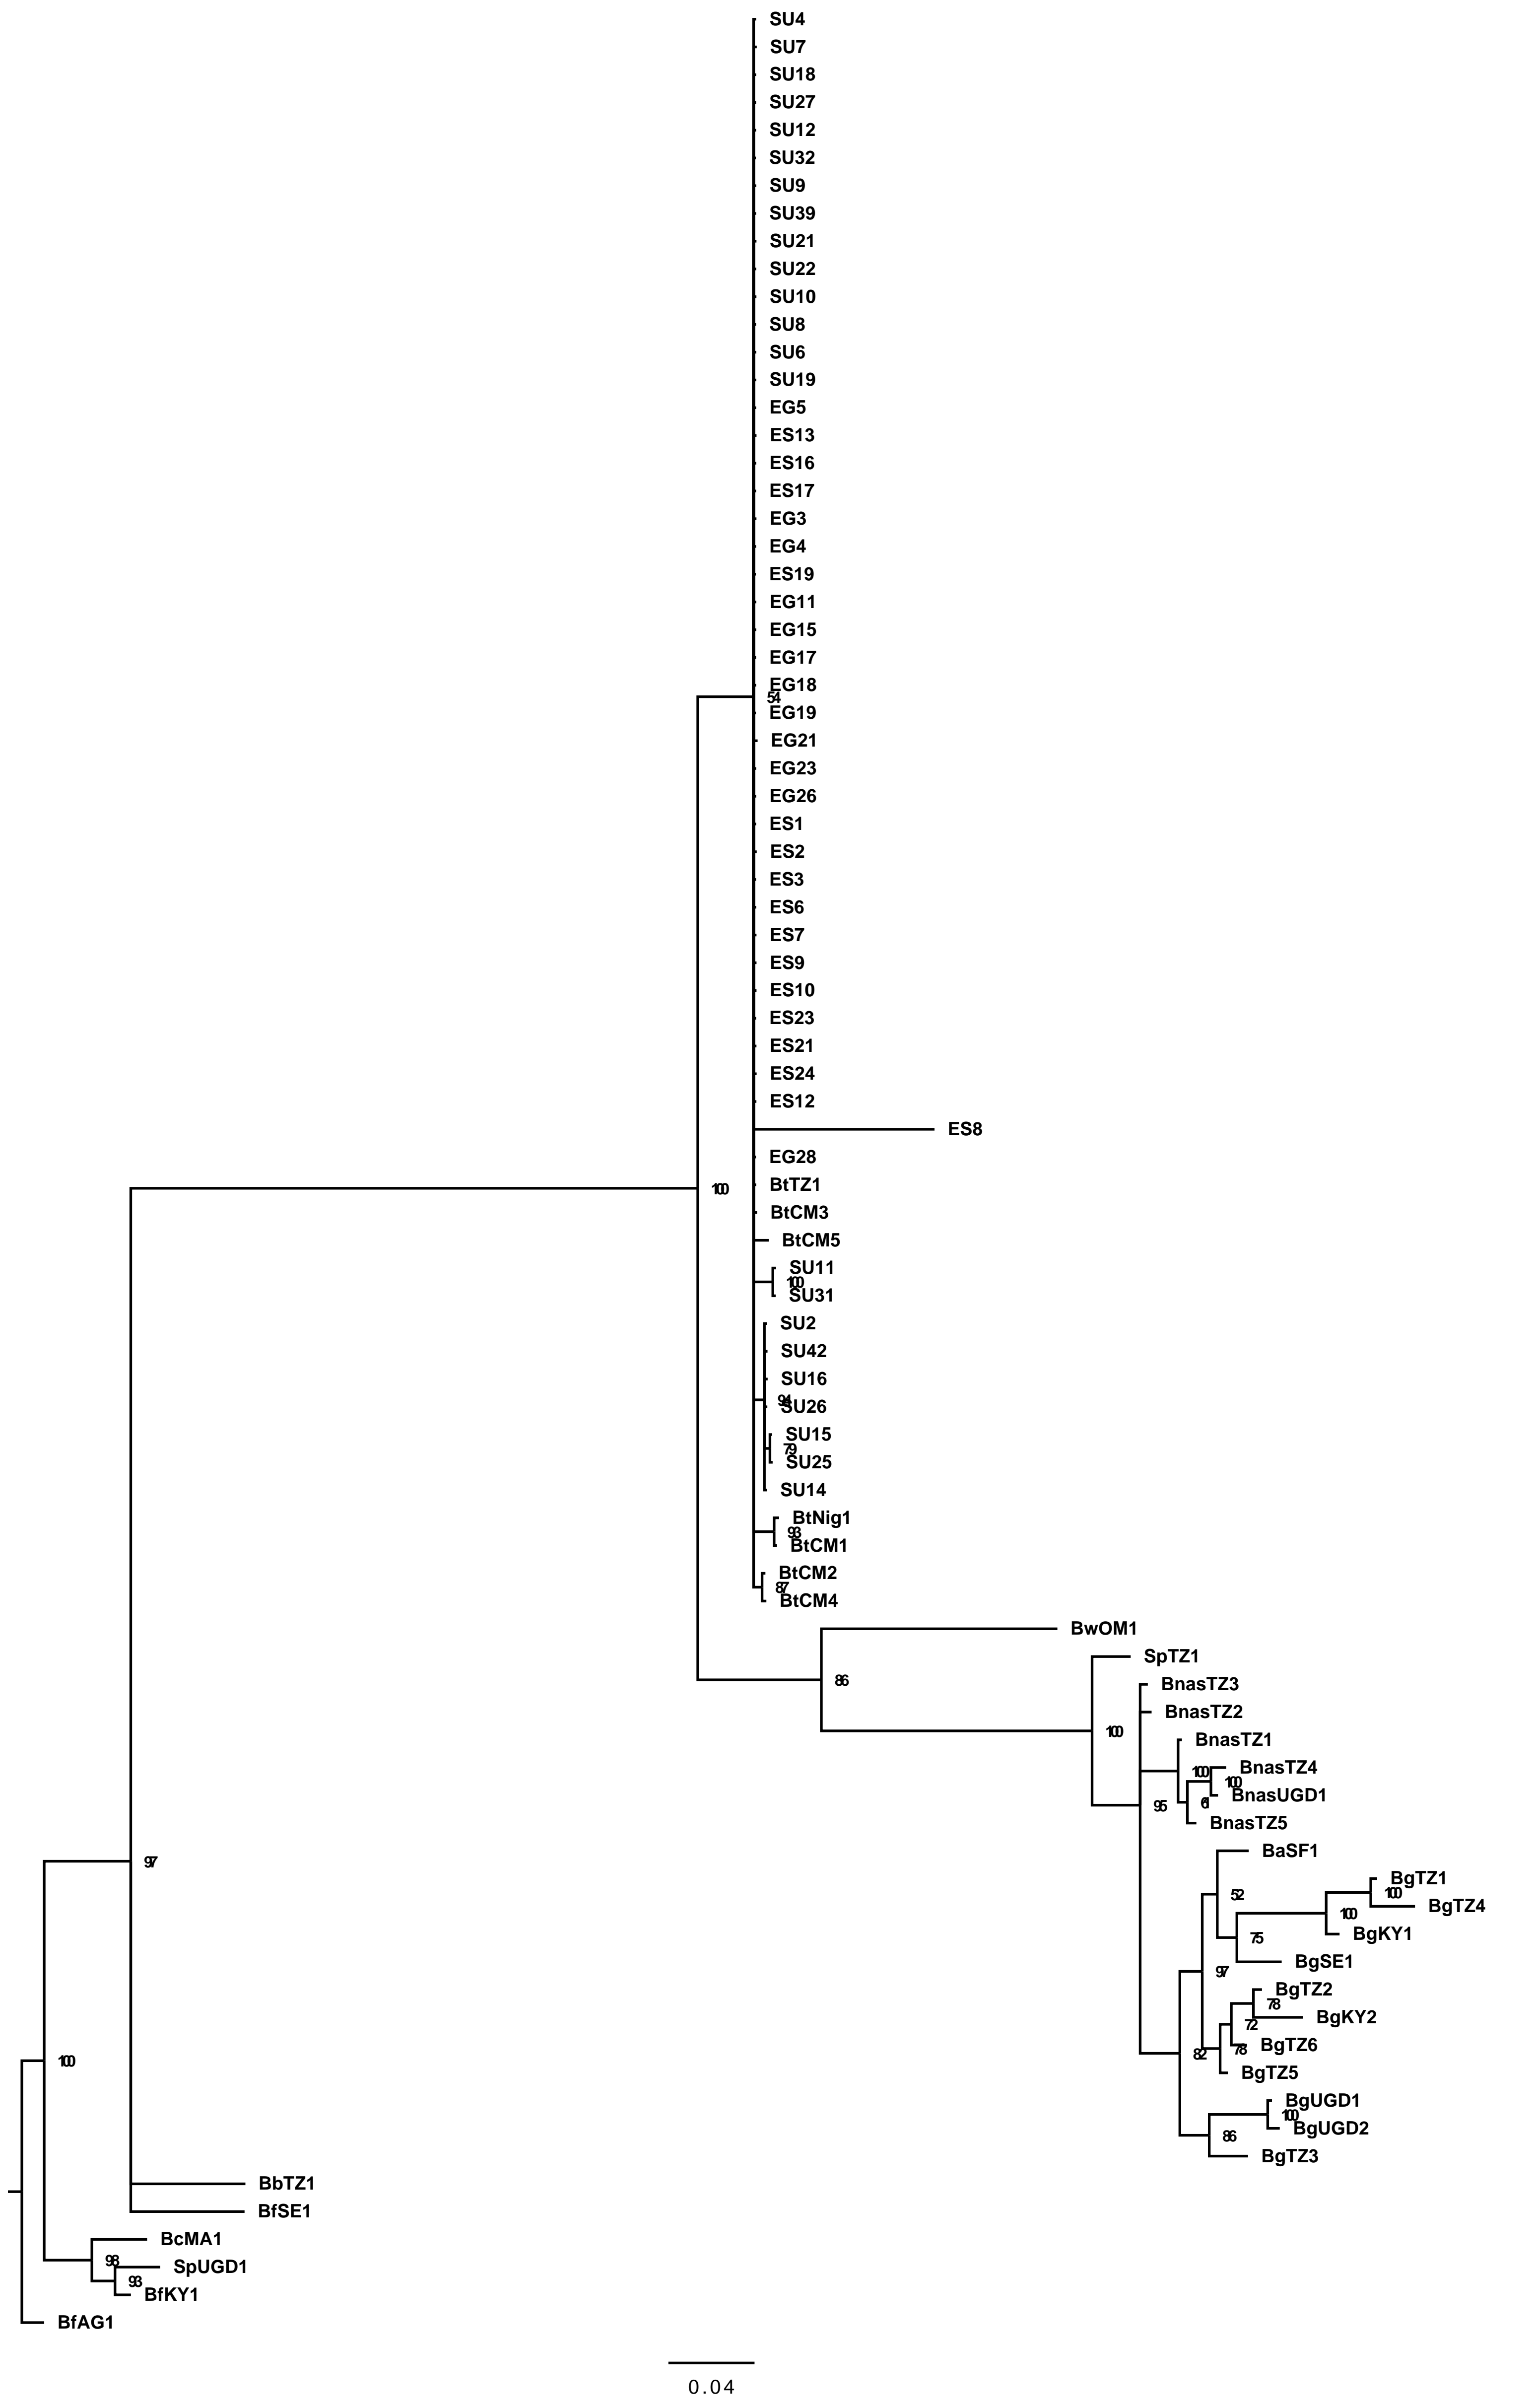

Supplement: s1 [file s1]

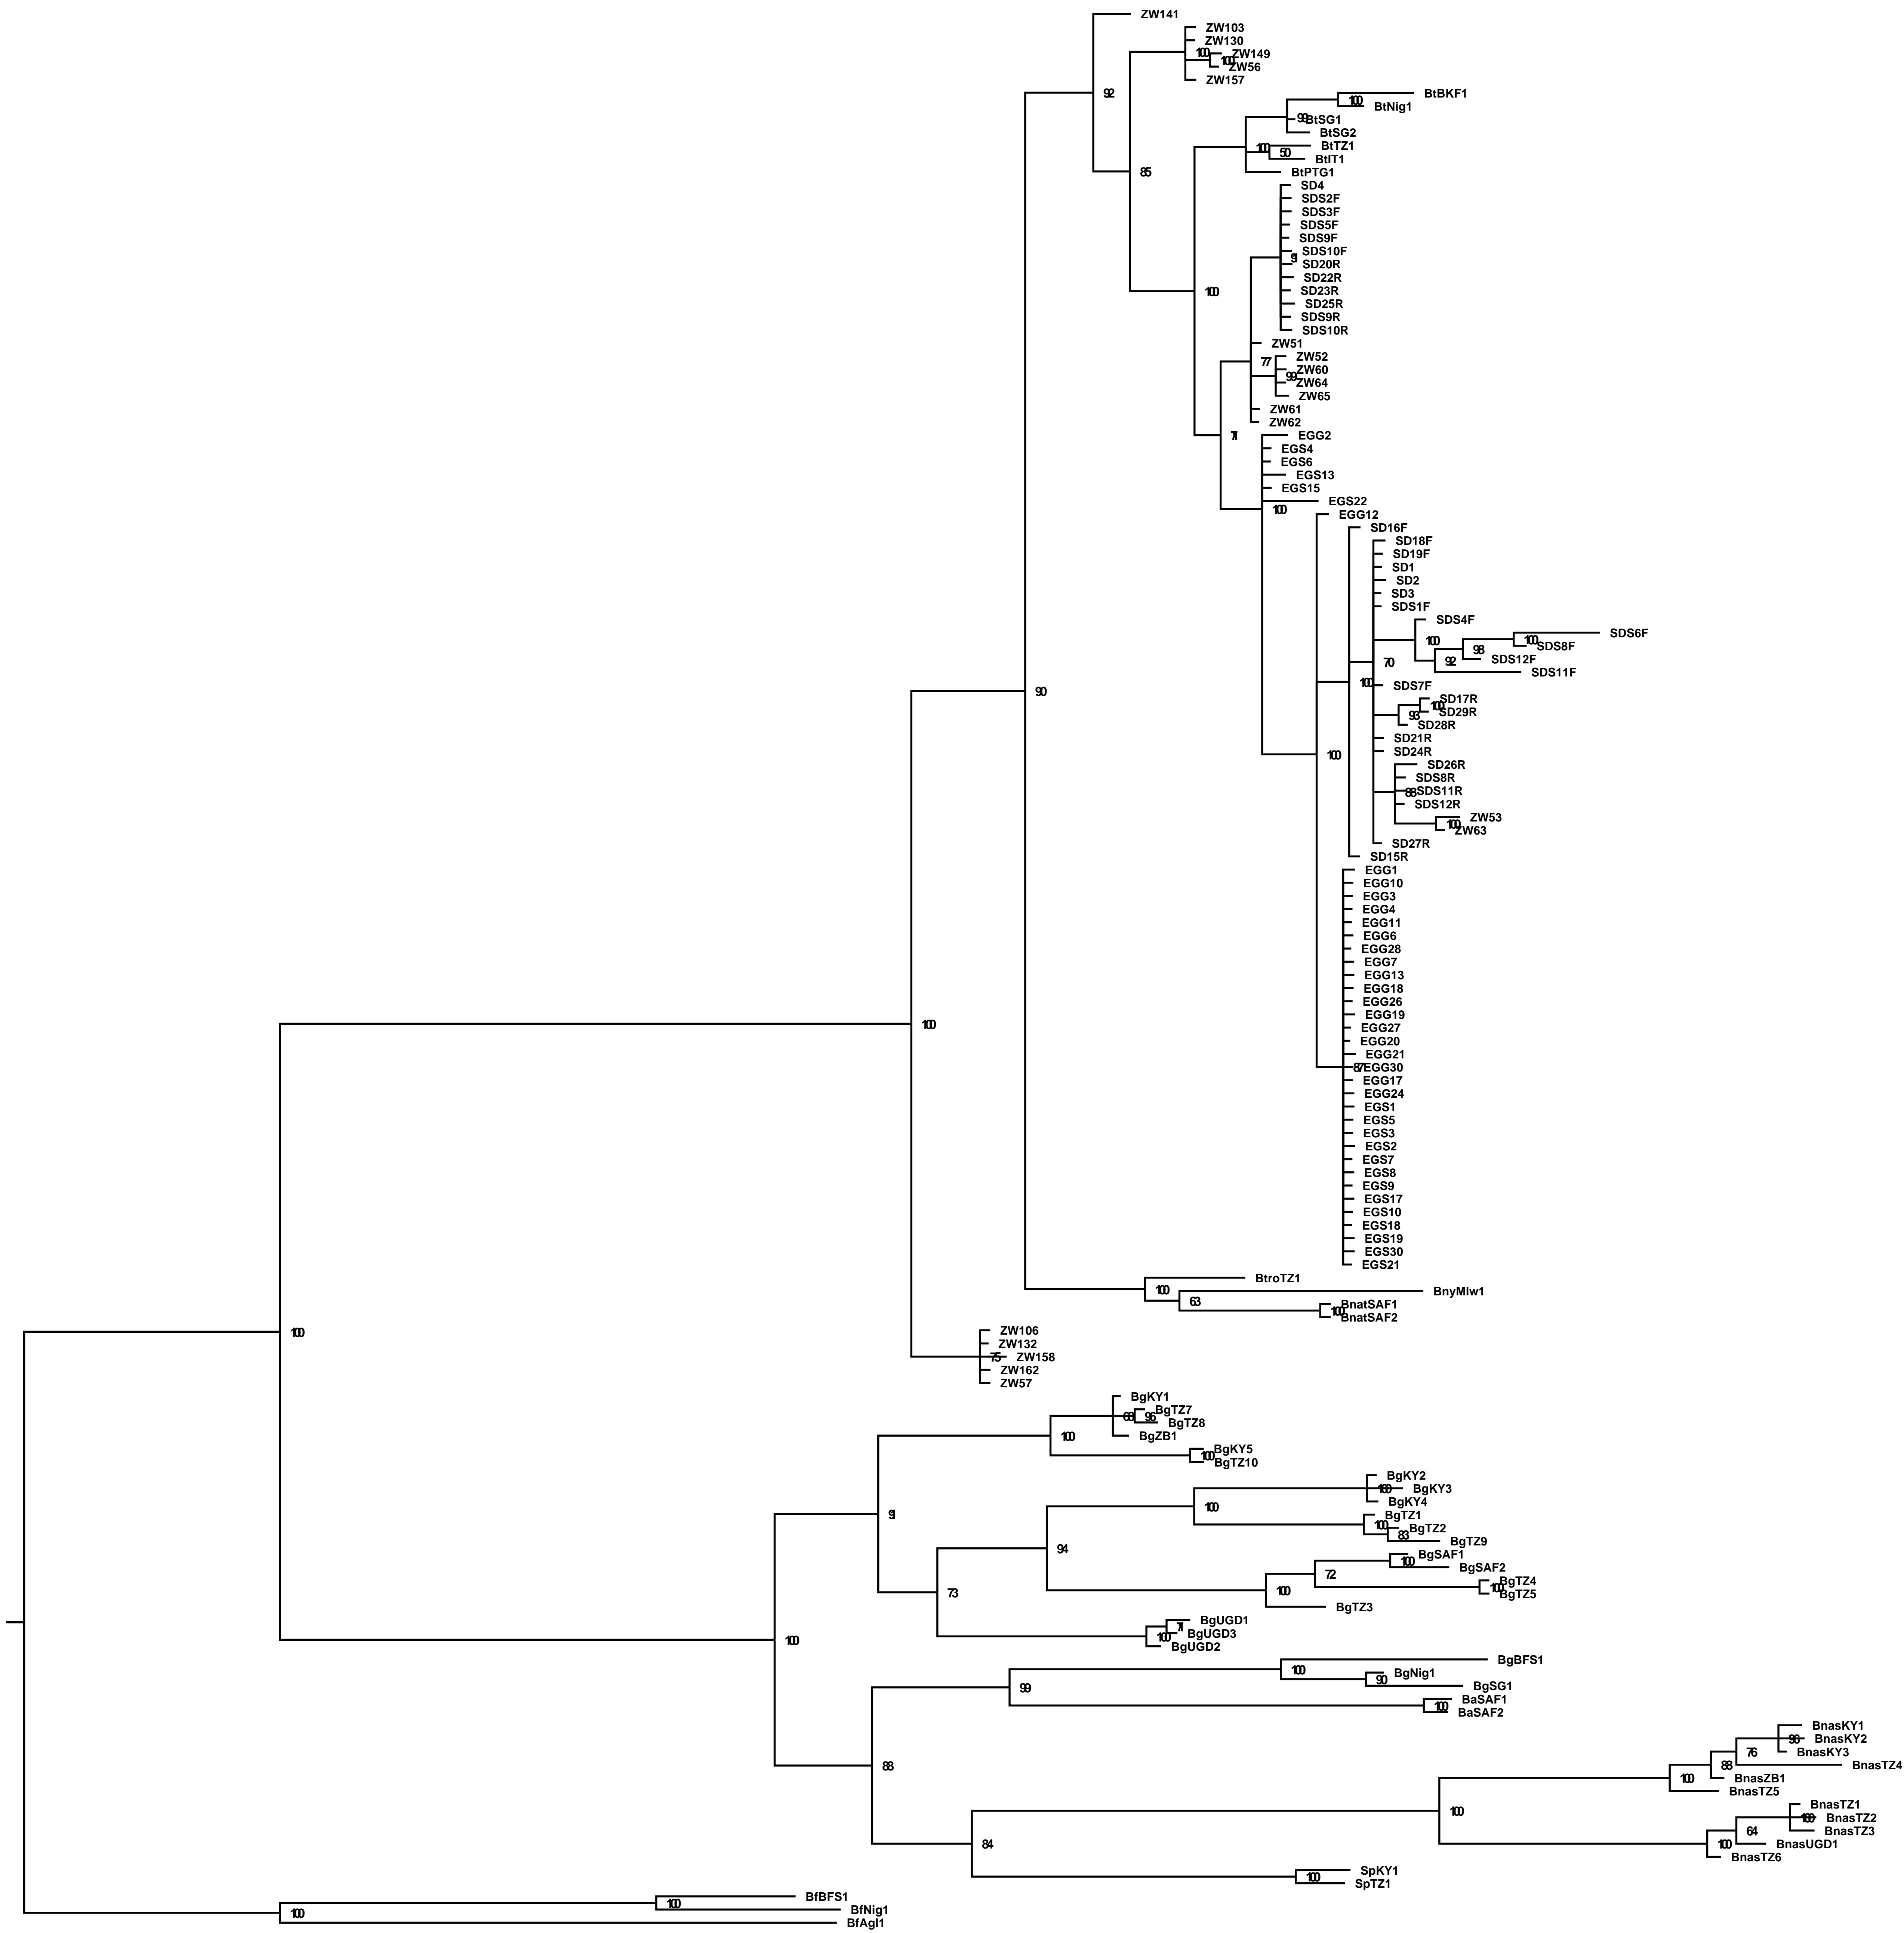

Supplement: s1 [file s1]
